# Supplementary material for: A practical and efficient synthesis of methyl levulinate from cellulosic biomass catalyzed by an aluminum-based mixed acid catalyst system
Source: Royal Society of Chemistry journal article supplement (doi:10.1039/c6ra15638j), 2016-01-01
Supplement: c6ra15638j1.pdf [file c6ra15638j1.pdf]

## Supporting Information for

### **A practical and efficient synthesis of methyl levulinate from cellulosic biomass catalyzed by an aluminum-based mixed acid catalyst system**

Ken-ichi Tominaga,<sup>a, b\*</sup> Koji Nemoto,<sup>a</sup> Yusuke Kamimura,<sup>a</sup> Atsushi Yamada,<sup>c</sup>  
Yasushi Yamamoto,<sup>c</sup> Kazuhiko Sato<sup>a, b</sup>

<sup>a</sup>National Institute of Advanced Industrial Science and Technology (AIST),  
Central 5, 1-1-1 Higashi, Tsukuba, Ibaraki 305-8569, JAPAN.

<sup>b</sup>Institute for Catalysis, Hokkaido University,  
Kita21, Nishi10, Kita-ku, Sapporo, Hokkaido 001-0021, Japan.

<sup>c</sup>Organic Chemistry Research Lab., Ube Industries, Ltd.  
1978-5, Kogushi, Ube, Yamaguchi 755-8633, JAPAN.

\* Corresponding author:

E-mail: k-tominaga@aist.go.jp; Tel: +81 29-861-8456

## 1. Methyl levulinate (MeLev) synthesis from cedar powder

### 1.1 General information

All reagents were of research grade and used without further purification. Al(OH)<sub>3</sub> was purchased from Sigma-Aldrich. p-toluenesulfonic acid (PTSA) and methanol were purchased from Kishida Chemical. Cedar powder ( $\alpha$ -cellulose = 43.6 wt%) was supplied by Nippon Paper Industries and was cutter-milled and sieved to decrease the particle size from 100 to 425  $\mu$ m.

HPLC analysis was carried out on a JASCO LC-2000Plus system equipped with a Scherzo SS-C18 column (250  $\times$  4.0 mm I.D., Imtakt Corp.). The quantitative analysis of MeLev was performed using a 20 vol% aqueous solution of methanol containing 10 mM formic acid as the mobile phase and 2-methyl tetrahydrofuran as the internal standard.

NMR analysis was carried out on a JEOL JNM-ECX400 system at room temperature. For <sup>1</sup>H NMR, tetramethylsilane (TMS) ( $\delta$  = 0) in CDCl<sub>3</sub> served as an internal standard.

### 1.2 Catalytic reaction and separation

To a 200 mL stainless steel autoclave equipped with a magnetic stirring bar, cedar powder (5.0 g), Al(OH)<sub>3</sub> (0.20 mmol), p-toluenesulfonic acid (2.0 mmol), and methanol (50 mL) were added and the apparatus was purged with N<sub>2</sub> (0.5 MPa). Then, the apparatus was heated to 180 °C and maintained at this temperature for 5 h with stirring. After the apparatus was cooled to room temperature and depressurized, the reaction solution was recovered. According to the HPLC analysis, the yield of MeLev was 72% based on the  $\alpha$ -cellulose in the cedar powder. The formed MeLev was separated using a Kugelrohr distillation apparatus. The isolation yield of MeLev was 1.11g (63% based on the  $\alpha$ -cellulose in the cedar powder).

### 1.3 <sup>1</sup>H NMR analysis of MeLev isolated

The <sup>1</sup>H NMR spectrum of MeLev isolated was shown in Fig. S1. Methyl levulinate (methyl 4-oxopentanoate): <sup>1</sup>H NMR (400 MHz, CDCl<sub>3</sub>):  $\delta$  2.197 (s, 3H), 2.584 (t,  $J$  = 6.4 Hz, 2H), 2.761 (t,  $J$  = 6.4 Hz, 2H), 3.681 (s, 3H).

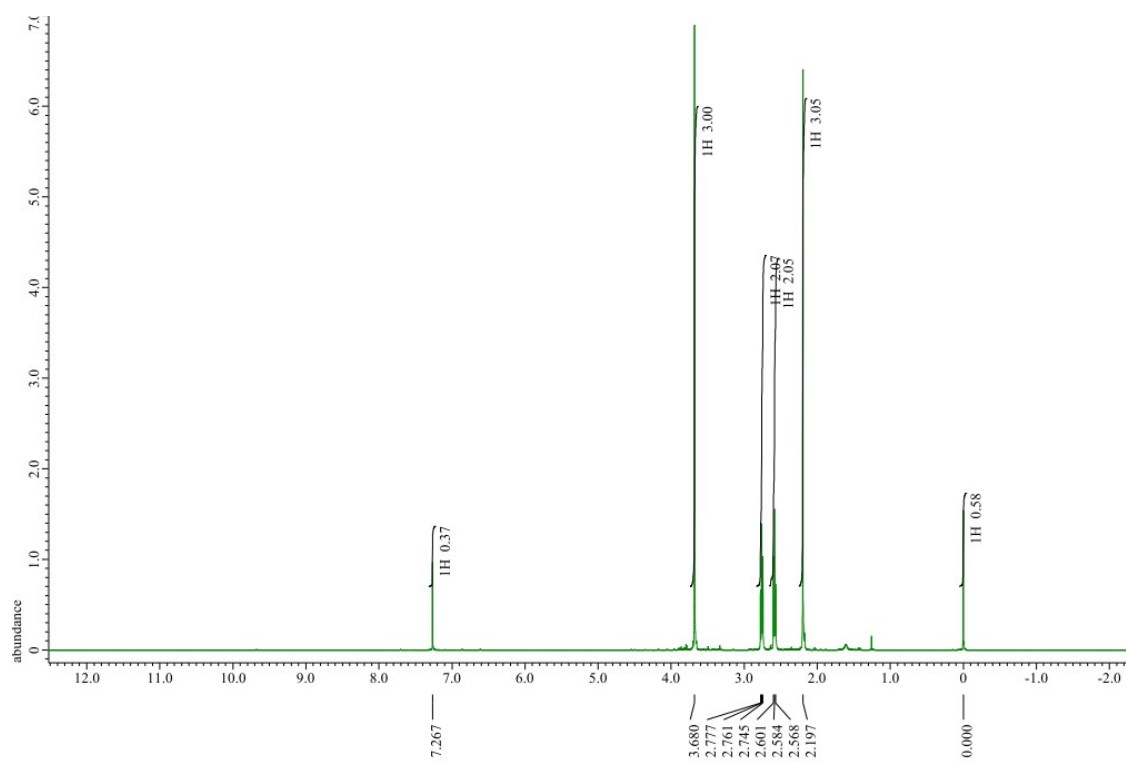

**Fig. S1**  $^1\text{H}$  NMR spectrum of MeLev isolated

## 2. Identification of metal species observed in ESI-MS analyses

The metal species detected with ESI-MS analyses (Fig. 5) are in good agreement with their calculated isotope distribution spectra.

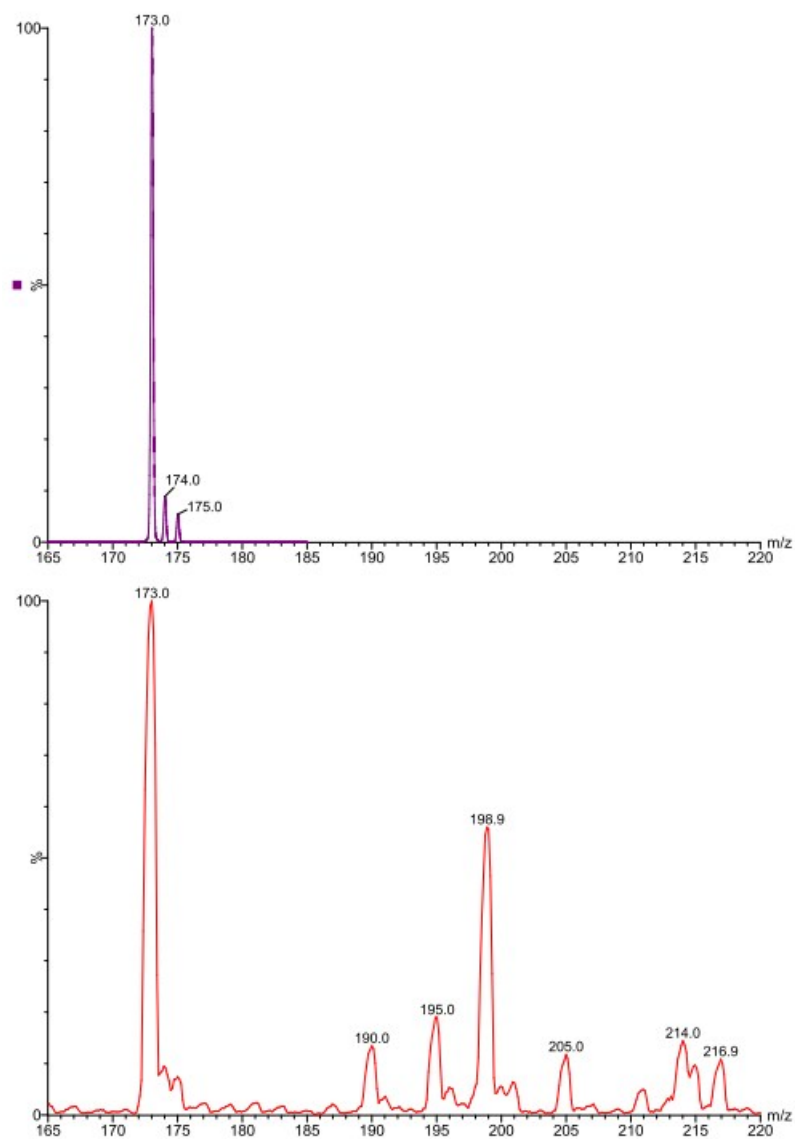

**Fig. S2** The isotope distribution spectrum of (a)  $[\text{TsOH}_2]^+$  (top) and the observed ESI-MS peaks in Fig. 5 (bottom).

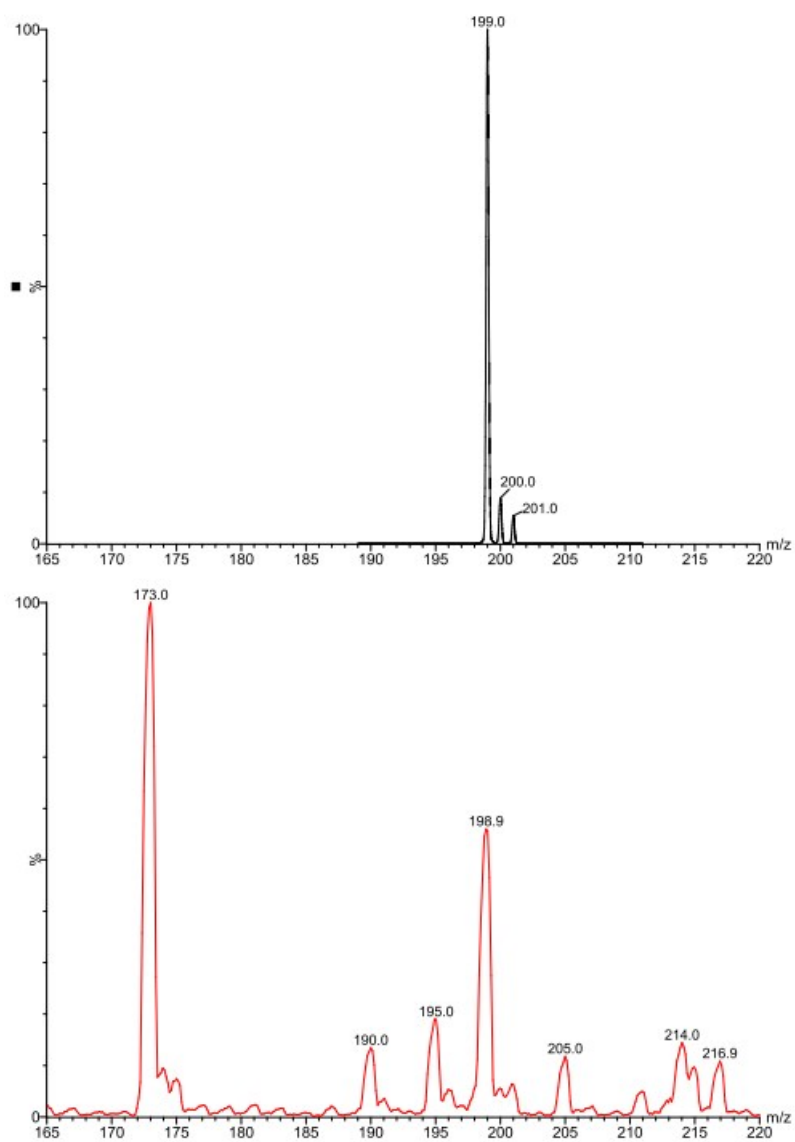

**Fig. S3** The isotope distribution spectrum of (b)  $[Al(OTs)H]^+$  (top) and the observed ESI-MS peaks in Fig. 5 (bottom).

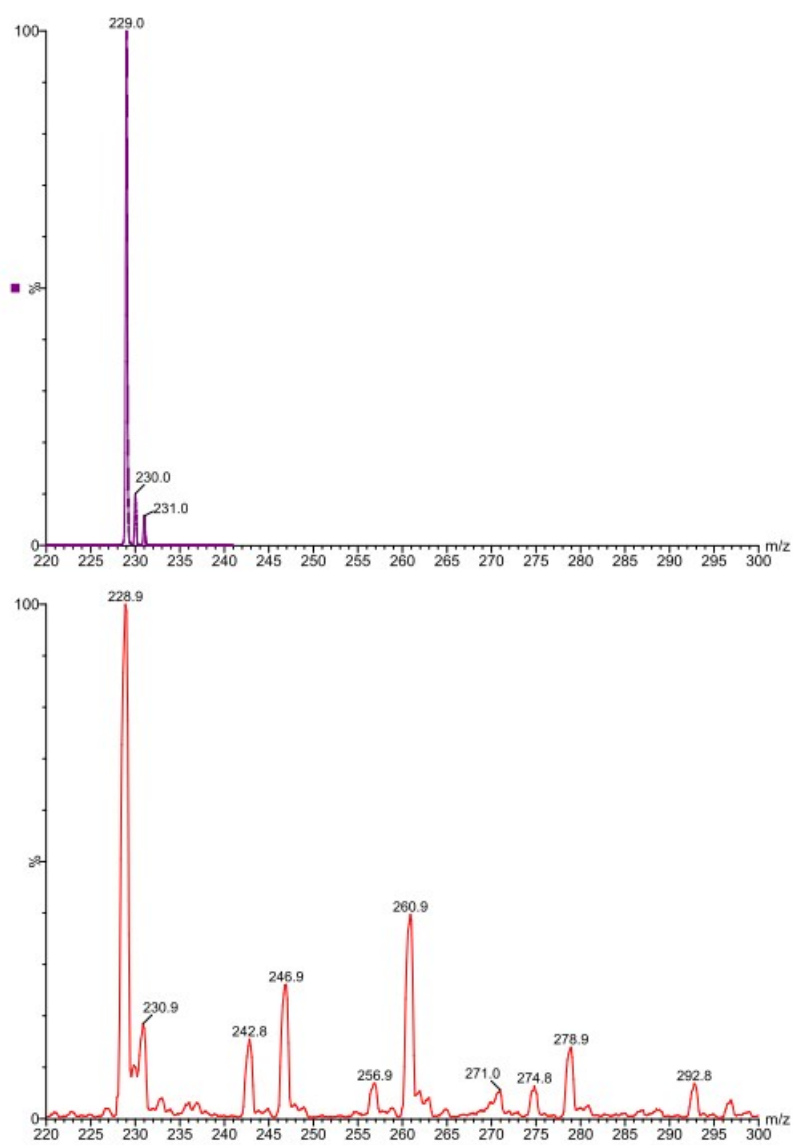

**Fig. S4** The isotope distribution spectrum of (c)  $[\text{Al}(\text{OTs})(\text{OMe})]^+$  (top) and the observed ESI-MS peaks in Fig. 5 (bottom).

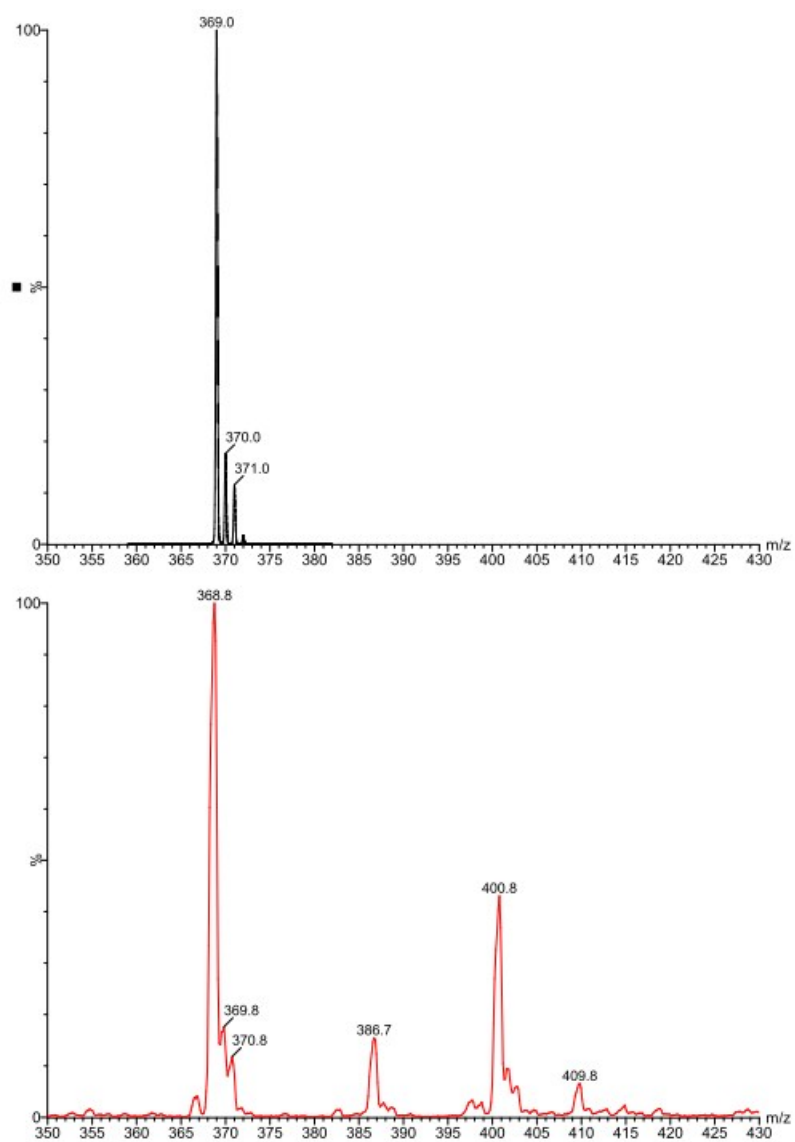

**Fig. S5** The isotope distribution spectrum of (d)  $[\text{Al}(\text{OTs})_2]^+$  (top) and the observed ESI-MS peaks in Fig. 5 (bottom).

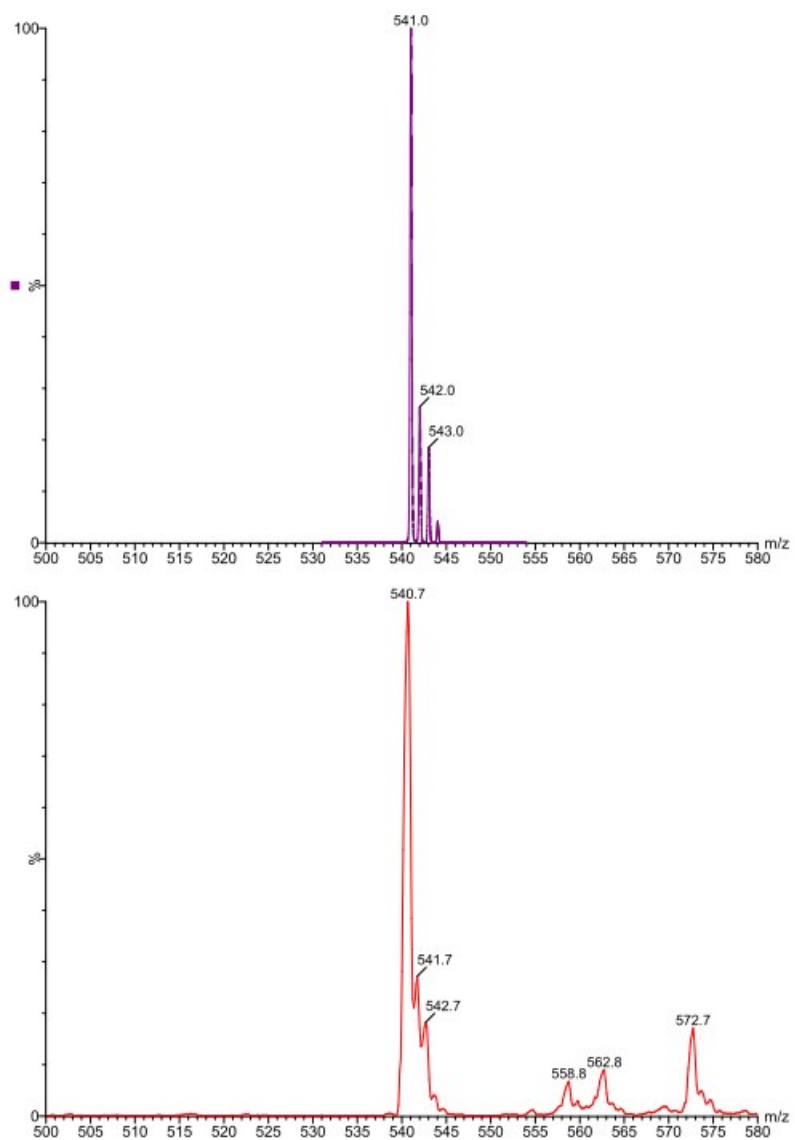

**Fig. S6** The isotope distribution spectrum of (e)  $[\text{Al}(\text{OTs})_3\text{H}]^+$  (top) and the observed ESI-MS peaks in Fig. 5 (bottom).



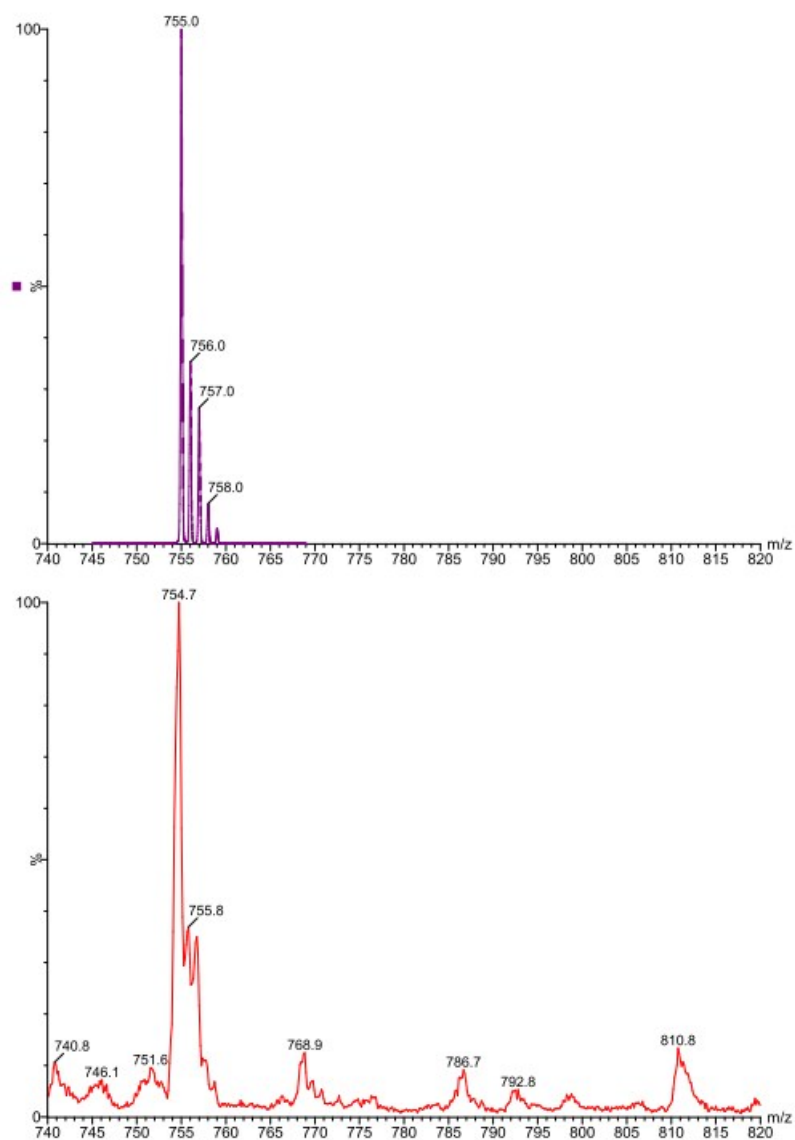

**Fig. S7** The isotope distribution spectrum of (f)  $[Al_2(OTs)_4OH]^+$  (top) and the observed ESI-MS peaks in Fig. 5 (bottom).

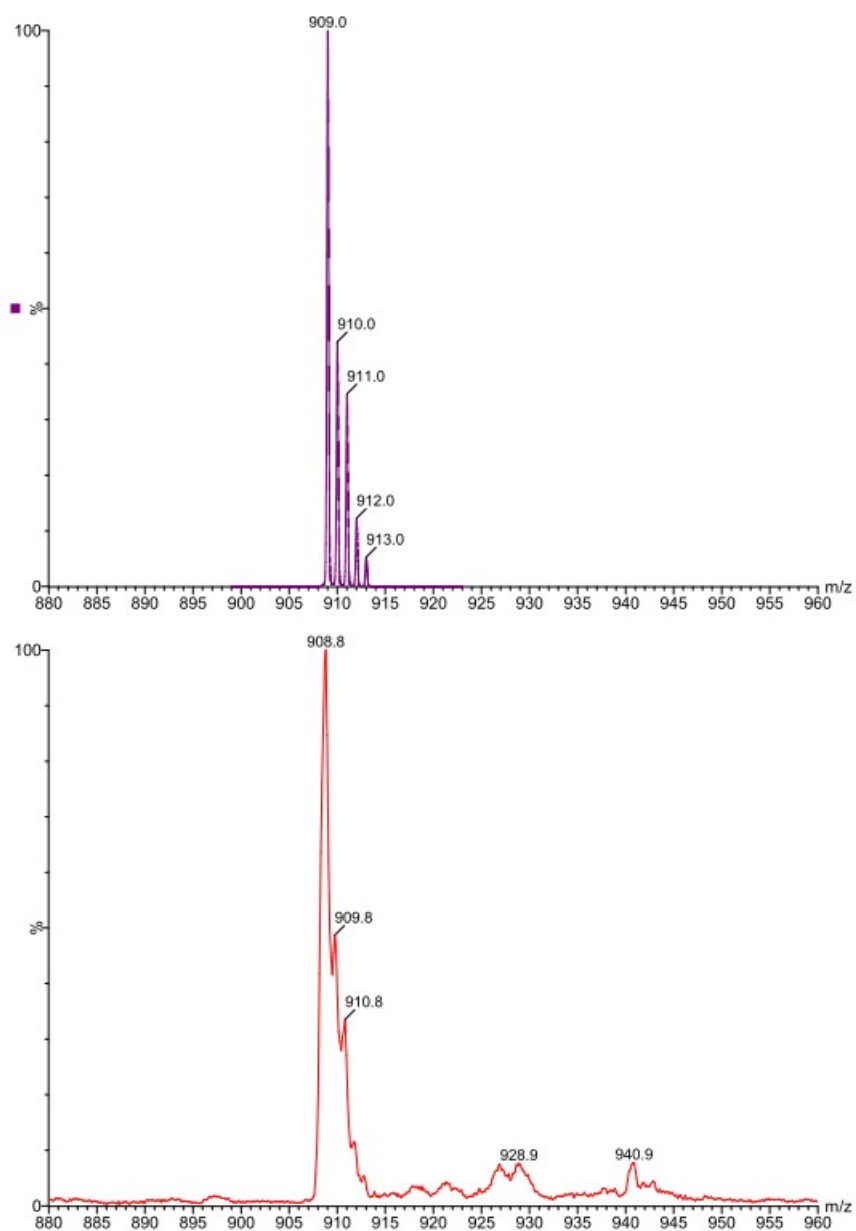

**Fig. S8** The isotope distribution spectrum of (g)  $[Al_2(OTs)_5]^+$  (top) and the observed ESI-MS peaks in Fig. 5 (bottom).
